# Supplementary material for: Diet-derived 25-hydroxyvitamin D3 activates vitamin D receptor target gene expression and suppresses EGFR mutant non-small cell lung cancer growth in vitro and in vivo
Source: PubMed Central journal article supplement (PMC4808047; doi:10.18632/oncotarget.6493), 2015-12-08
Supplement: oncotarget-07-0995-s001.pdf [file oncotarget-07-0995-s001.pdf]

## SUPPLEMENTARY FIGURES

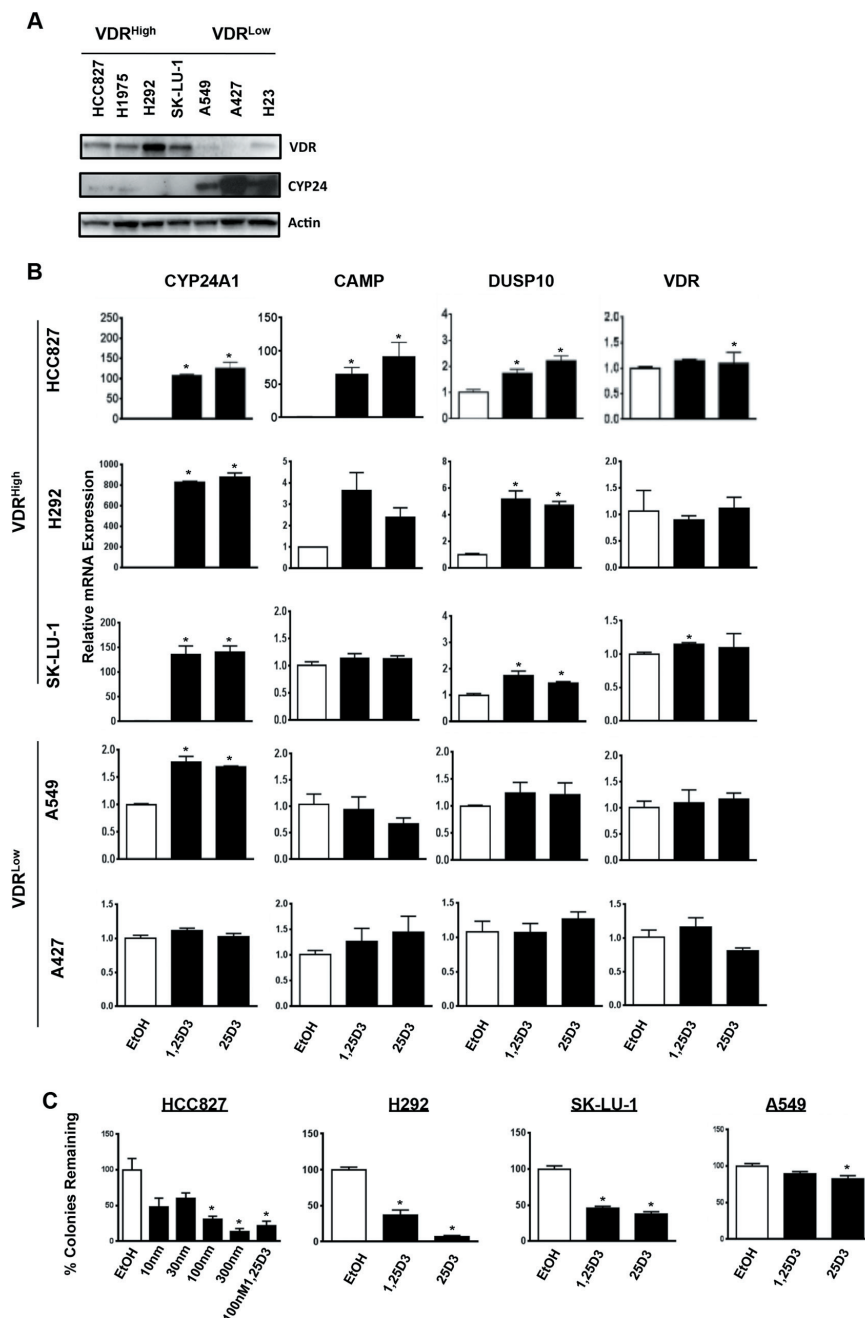

**Supplementary Figure S1: VDR<sup>high</sup> NSCLC cells respond to 25D3 treatment.** **A.** A panel of NSCLC cells with varying VDR protein expression was examined for 25D3 responsiveness. HCC827, H292, H1975, and SK-LU-1 are considered VDR<sup>high</sup> cell lines due to the higher basal VDR protein expression. The cell lines A549, A427 and H23 are considered VDR<sup>low</sup> and express very low basal VDR, and higher CYP24A1 protein. **B.** VDR<sup>high</sup> and VDR<sup>low</sup> cells were treated with vehicle control, 100nM 1,25D3 or 1 $\mu$ M 25D3 for six, 24 or 48 hours (only six hour data shown). VDR<sup>high</sup> cells display significant induction of VDR target genes when exposed to both metabolites, while VDR<sup>low</sup> cells do not respond to the same magnitude. **C.** Furthermore, VDR<sup>high</sup> cells are at least 50% growth inhibited when treated with vitamin D3 metabolites, including various doses of 25D3 (HCC827). VDR<sup>low</sup> cells only reach a maximal of 11% growth inhibition upon 25D3 exposure. Asterisks represent  $p < 0.05$  by Student's  $t$  test and are a comparison between the ethanol treated group and either the 1,25D3 or 25D3 treatment.

## Cell line mRNA data

## COSMIC Database

| Cell Line | Av. Corrected Ct | Fold Change |
|-----------|------------------|-------------|
| H292      | 11.2             | 10.3        |
| A549      | 11.7             | 7.18        |
| H3122     | 12.8             | 3.35        |
| HCC827    | 14.1             | 0.99        |

Copy Number Gain 23%  
Copy Number Loss 12.4%

**Supplementary Figure S2: *CYP27B1* mRNA expression is variable in NSCLC.** *CYP27B1* mRNA expression was surveyed across NSCLC cell lines (left) and the COSMIC database. RNA was isolated from cell lines and qRT-PCR was performed to examine *CYP27B1* expression. Shown here are the raw Ct values with GAPDH subtracted (average corrected Ct). Data from the COSMIC database further indicate that the *CYP27B1* gene is subjected to copy number gains or losses.
